# Supplementary material for: Polymorphism and porosity in 4-[(4-hydroxy-3,5-dimethylphenyl)(5-methyl-1H-imidazol-4-yl)methyl]-2,6-dimethylphenol
Source: Royal Society of Chemistry journal article supplement (doi:10.1039/c3ce40407b), 2013-01-01
Supplement: c3ce40407b.pdf [file c3ce40407b.pdf]

## Supporting Information

### Polymorphism and porosity in 4-[(4-hydroxy-3, 5-dimethylphenyl) (5-methyl-1H-imidazol-4-yl) methyl]-2, 6- dimethylphenol

Bhaskar Nath, Jubaraj B. Baruah\*

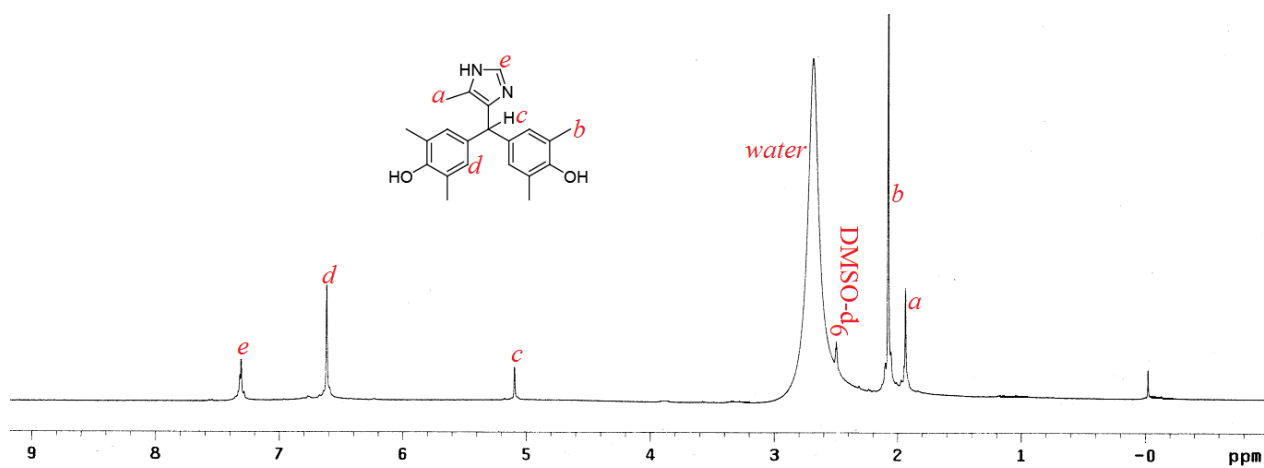

Figure S1:  $^1\text{H}$ -NMR (400 MHz) of Imbp in  $\text{DMSO-d}_6$

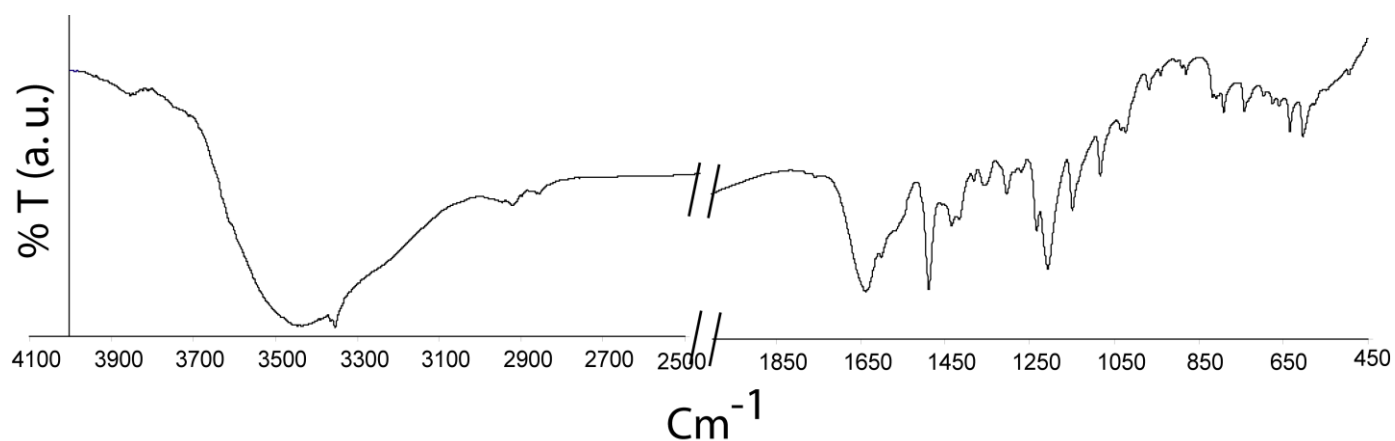

Figure S2: FT-IR spectra (KBr,  $\text{cm}^{-1}$ ) of the polymorph I

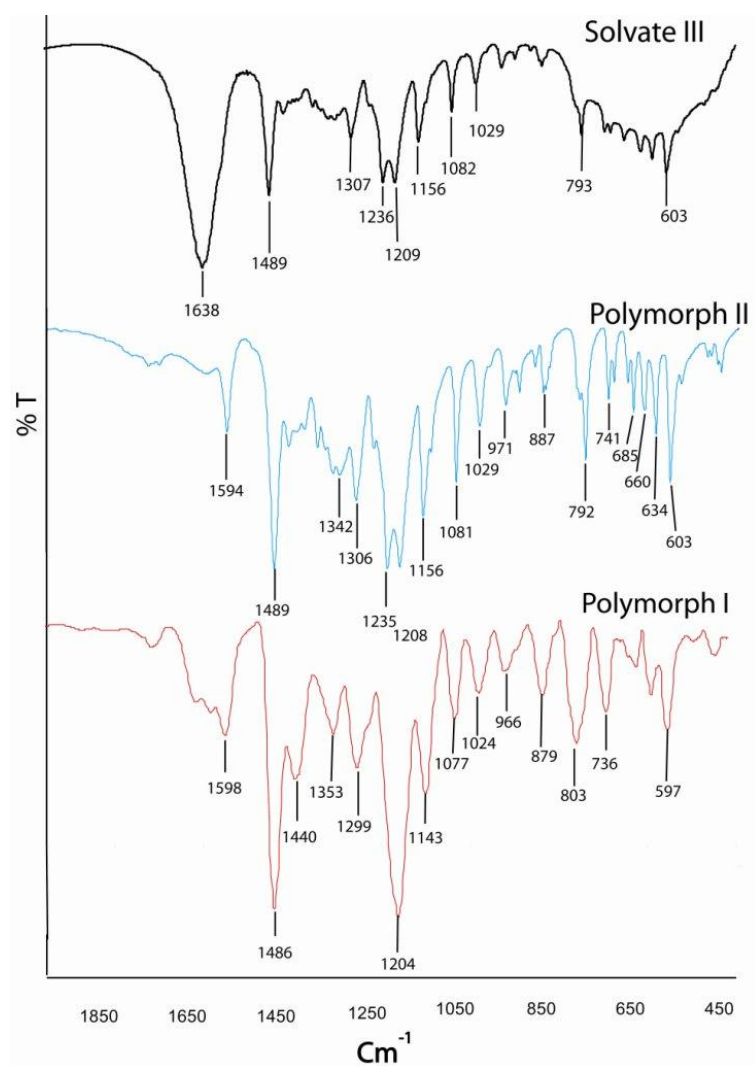

**Figure S3:** Comparison of solid state IR (KBr,  $\text{cm}^{-1}$ ) spectra of polymorph **I** (bottom, red) and polymorph **II** (middle, blue) and solvate **III** (top, black) in the region of 2000-450  $\text{cm}^{-1}$ .

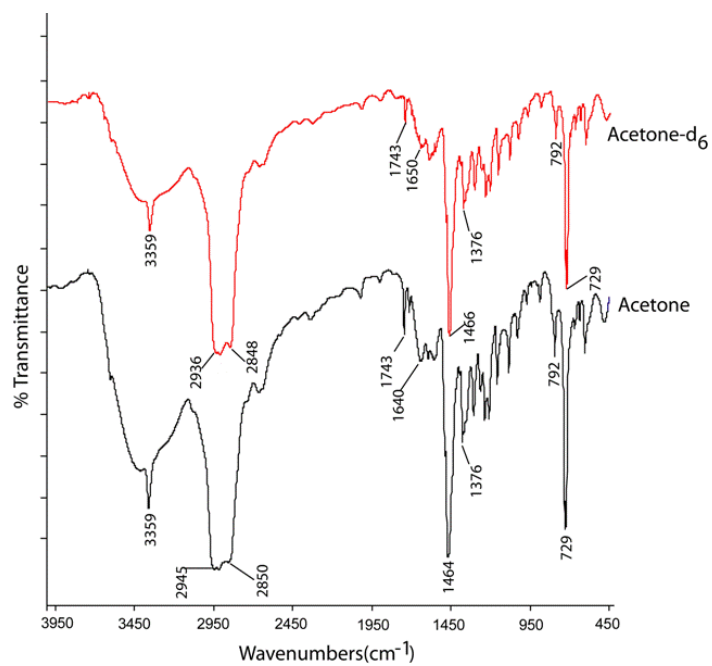

**Figure S4:** FT-IR spectra (Film) of acetone-**Imbp** and acetone-*d*<sub>6</sub>-**Imbp** solvate.

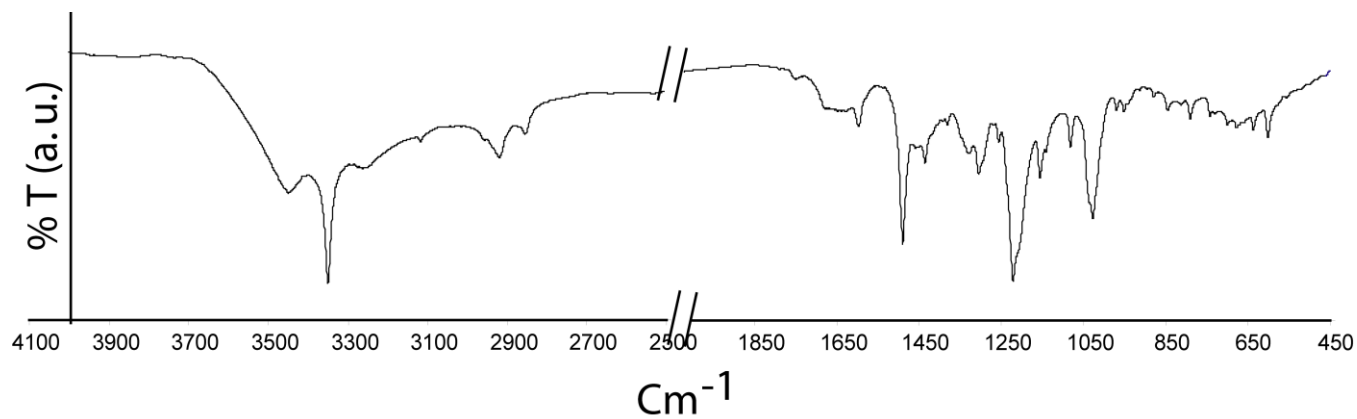

**Figure S5:** FT-IR spectra (KBr, cm<sup>-1</sup>) of the solvate **IV**

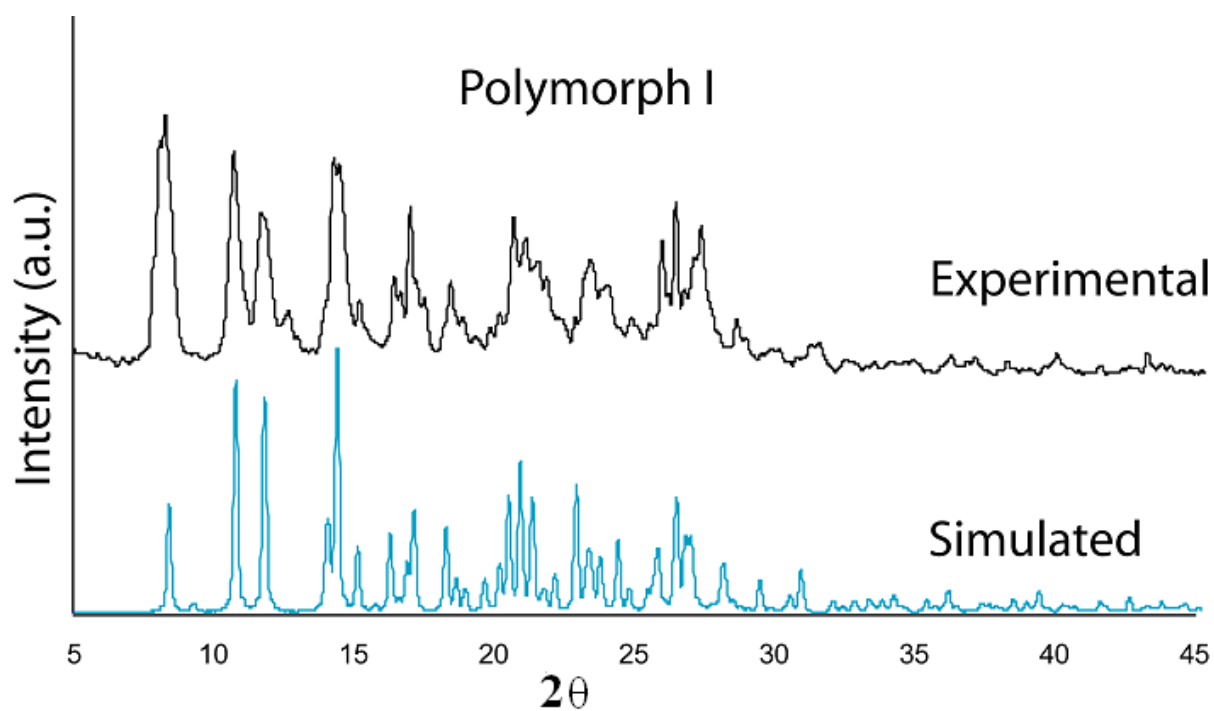

**Figure S6:** Comparison of the simulated and experimental PXRD pattern of solvate **III**.

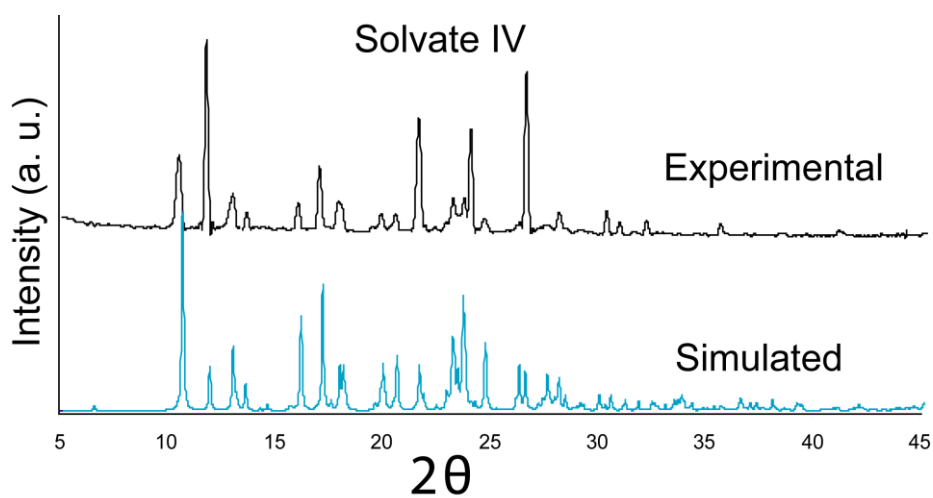

**Figure S7:** Comparison of the simulated and experimental PXRD pattern of solvate **IV**.

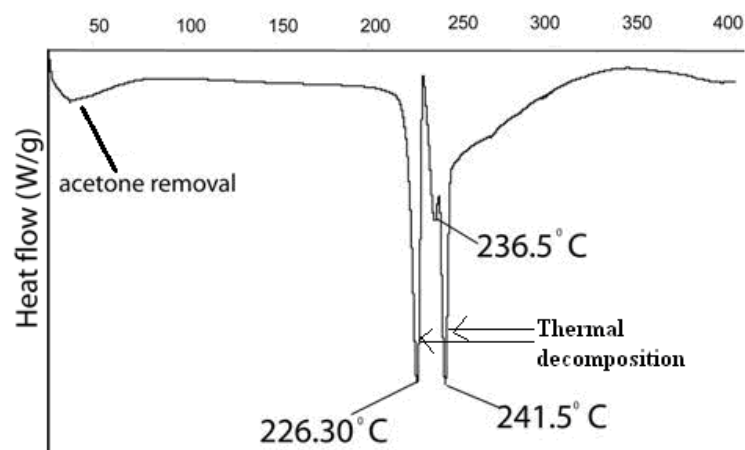

**Figure S8:** DSC of the solvate III (heating rate 5°C/min).

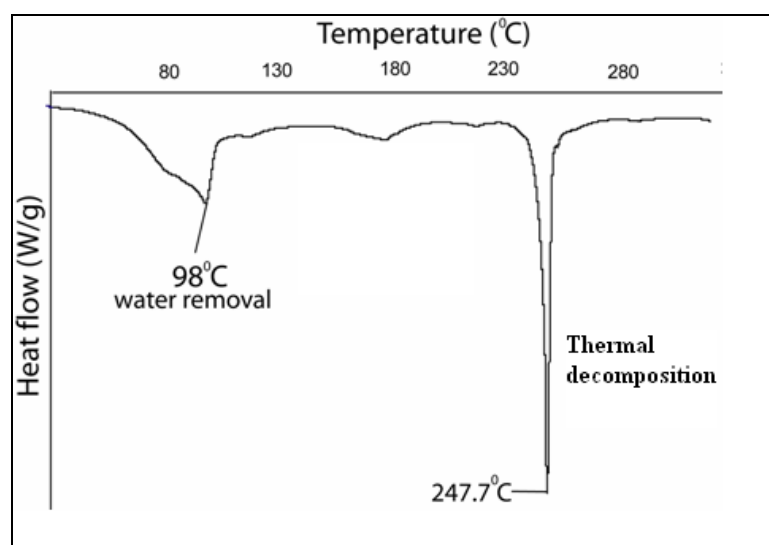

**Figure S9:** DSC of the solvate IV (heating rate 5°C/min)

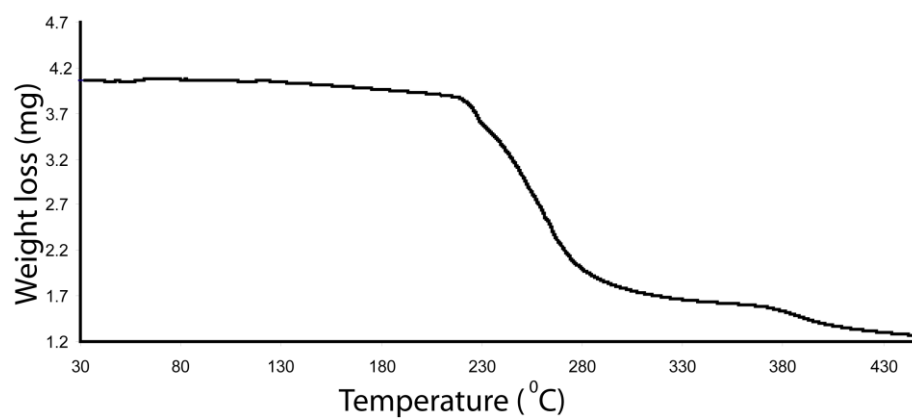

**Figure S10:** TGA of the **polymorph II** showing the absence of disordered solvent molecules in the voids (heating rate 5°C/min).

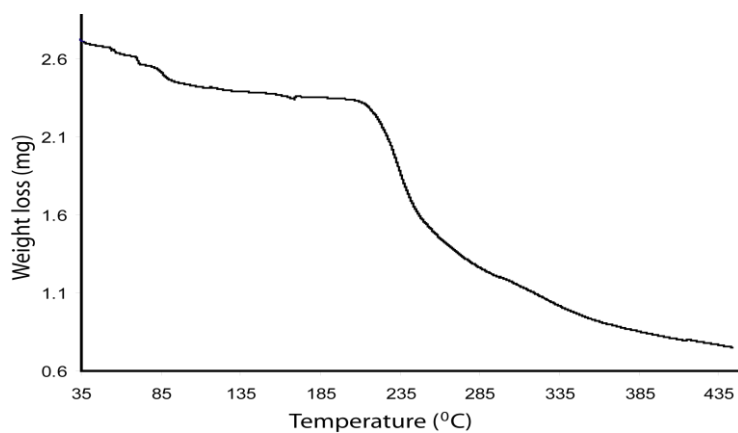

**Figure S11:** TGA of the **solvate III** (heating rate 5° C / min).

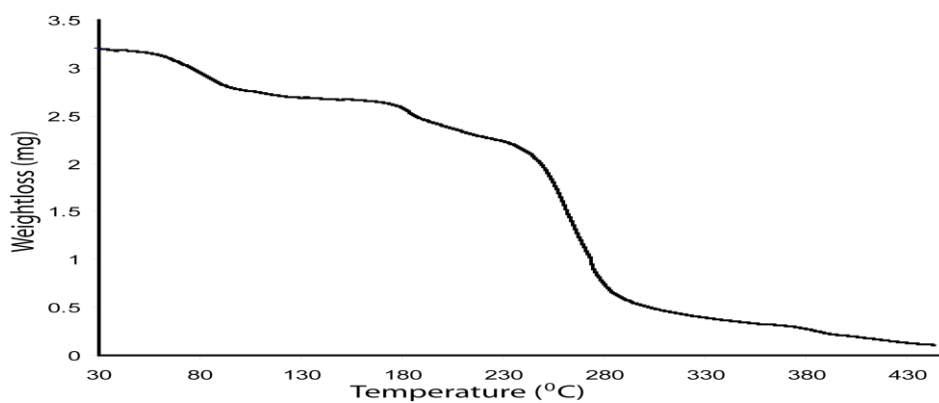

**Figure S12:** TGA of the **solvate IV** (heating rate 5° C / min)

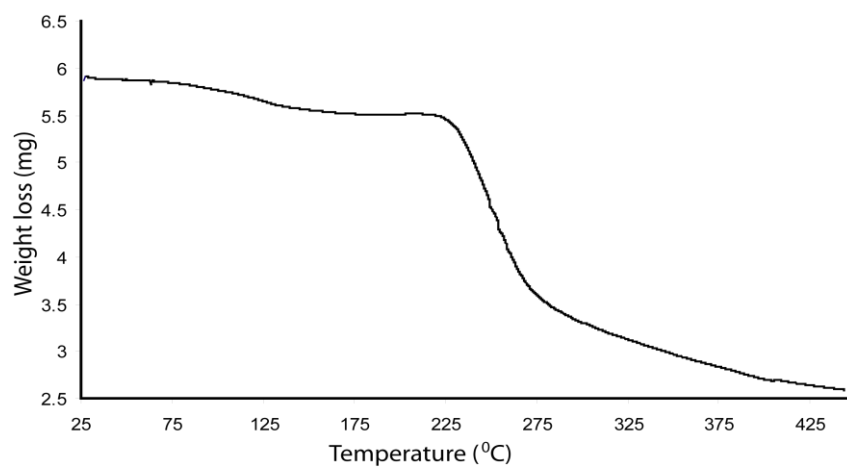

**Figure S13:** TGA of the **polymorph II** after exposing it to acetone vapour for 2 hours. (heating rate 5° C / min)

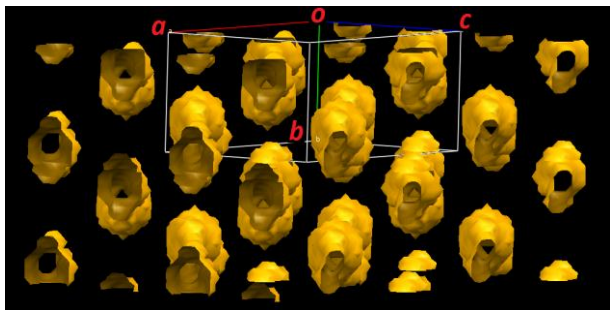

(a)

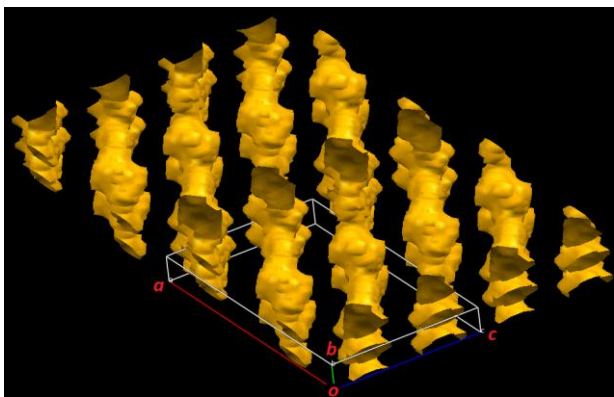

(b)

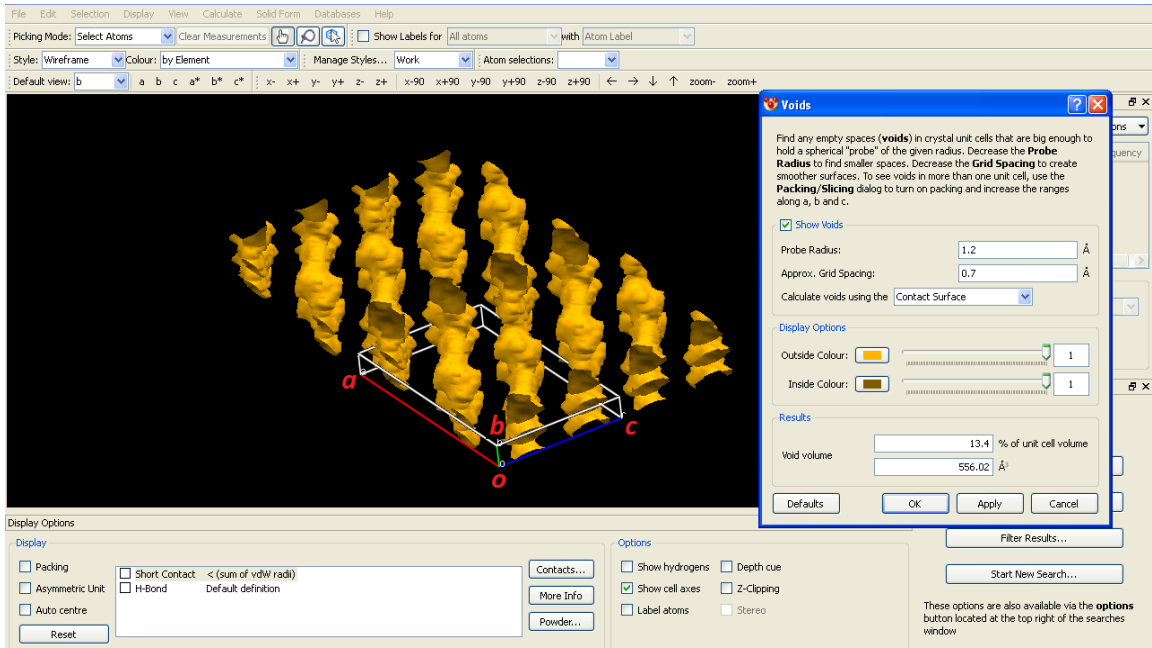

(c)

**Figure S14:** Presentation of the voids in the polymorph **II** from different directions.

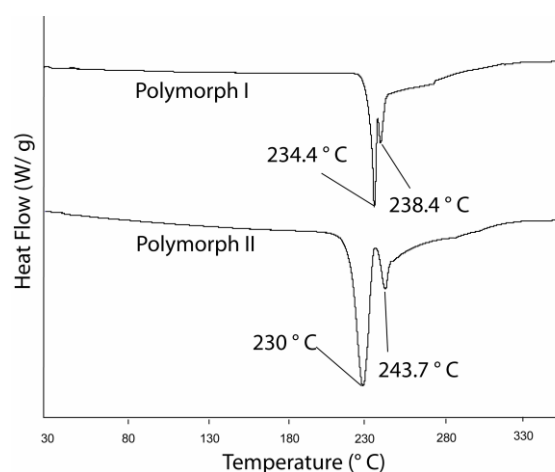

**Figure S15:** DSC of the polymorph **I** and **II** (heating rate 5° C/ minute).

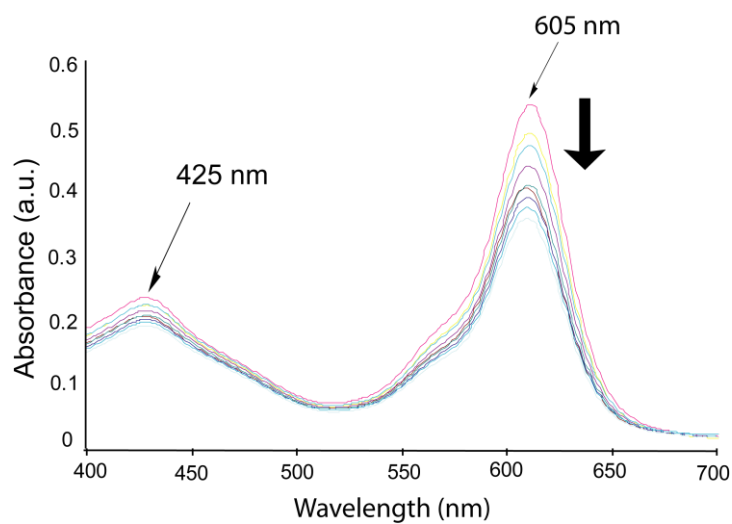

**Figure S16:** UV-visible spectra of DMSO solvate ( $1.2 \times 10^{-2}$  M, 2 mL) with 50  $\mu$ L incremental addition of acetone.

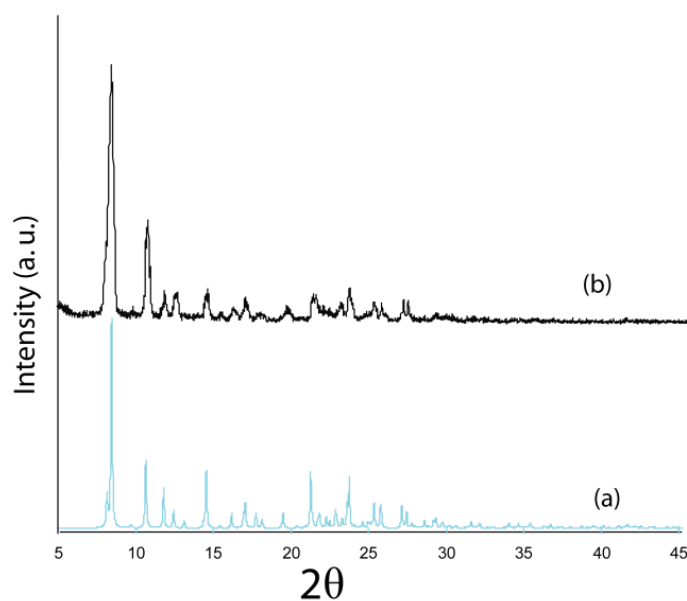

**Figure S17:** The PXRD of the (a) acetone solvate **III** (simulated) and the (b) PXRD of the polymorph **II** after exposure to acetone vapour (*suggests transformation of **II** to **III***).

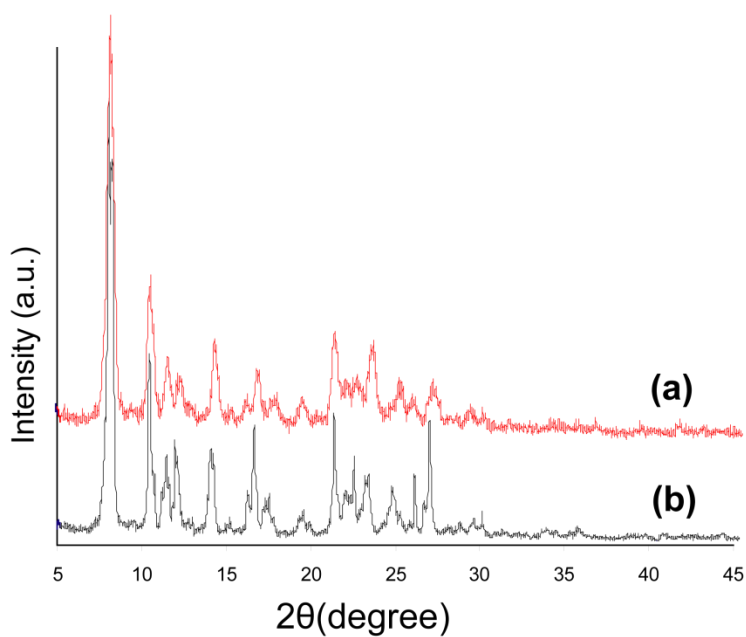

**Figure S18:** The experimentally observed PXRD of the (a) DMSO solvate **IV** after heating up to 200°C and the (b) polymorph **II** (*Suggesting conversion of **IV** to **II***).

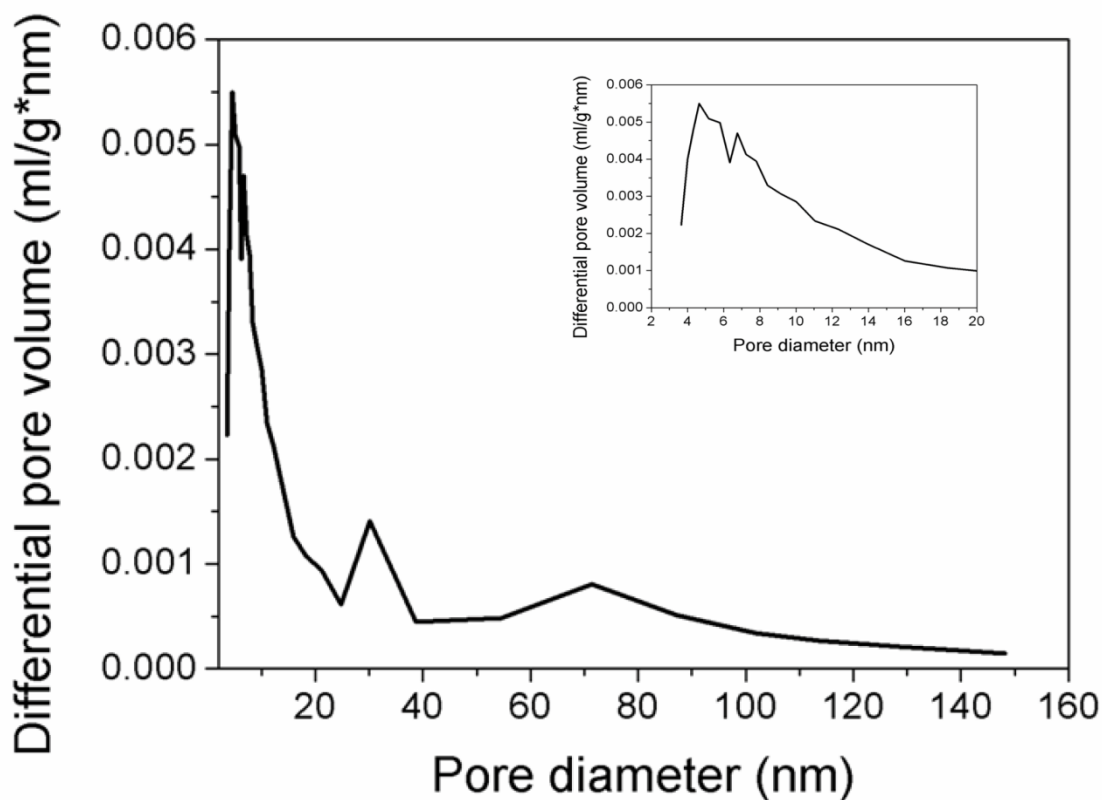

**Figure S19:** Plot for pore size distribution of the polymorph **II**

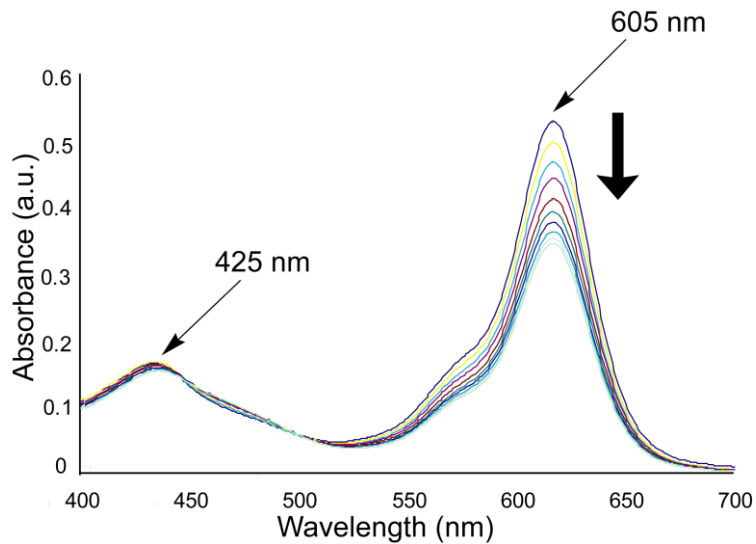

**Figure S20:** The changes of UV-vis spectra of **II** in DMSO ( $2 \times 10^{-2}$  M, 2 mL,) on 50  $\mu$ L incremental addition of DMSO.

**Table S1:** Some relevant hydrogen-bond parameters of **I-IV**.

| Compound | D-H...A | $d_{D-H}(\text{\AA})$ | $d_{H...A}(\text{\AA})$ | $d_{D...A}(\text{\AA})$ | $\angle D-H...A(^{\circ})$ |
|----------|---------|-----------------------|-------------------------|-------------------------|----------------------------|
|----------|---------|-----------------------|-------------------------|-------------------------|----------------------------|

|     |                                      |         |          |           |         |
|-----|--------------------------------------|---------|----------|-----------|---------|
| I   | O(1)-H···O (2) [x, 3/2-y,1/2+z]      | 0.82    | 1.95     | 2.705 (2) | 152     |
|     | O(2)-H···N(2) [1-x, 2-y, -z]         | 0.82    | 1.91     | 2.669(3)  | 154     |
| II  | O(1)-H···O (2) [1/2+x, 1/2-y,1/2+z ] | 0.82    | 1.89     | 2.680(8)  | 161     |
|     | O(2)-H···N(2) [ -x, 1-y, 1-z]        | 0.82    | 1.84     | 2.617(7)  | 157     |
| III | O(1)-H···N(2) [1-x,-y,-z]            | 0.82    | 1.86     | 2.6241    | 155     |
|     | O(2)-H···O(1) [-1/2+x,1/2-y,-1/2+z]  | 0.82    | 1.92     | 2.6750    | 153     |
|     | C(13)-H···O3                         | 0.96    | 2.71     | 3.633     | 160.74  |
| IV  | O(1)-H···N(2) [1-x,1-y,-z]           | 0.86(6) | 1.87(6)  | 2.721(5)  | 169(5)  |
|     | O(2)-H···O(4)                        | 0.87(6) | 1.91(4)  | 2.702(6)  | 151(5)  |
|     | O(4)-H···O(2)                        | 0.84(5) | 2.24(13) | 2.702(6)  | 114(10) |
|     | O(4)-H···O(1) [x,1/2-y,1/2+z]        | 0.87(3) | 2.04(4)  | 2.889(6)  | 164(4)  |
|     | C(12)-H···O(3)                       | 0.929   | 2.696    | 3.520     | 148.24  |
|     | C(15)-H···O(1) [1-x,1-y,-z]          | 0.93    | 2.57     | 3.490(5)  | 172     |
